# Supplementary material
Source: Springer Nature journal article supplement (https://www.springermedizin.de/resource/supplementary/13034_2013_280_MOESM4_ESM.docx/9652624)
Supplement: MOESM4 [file 9652624]

**Table 3**

Odds ratio (and 95% Confidence intervals) for comorbid DSM disorders (n=279)

|  |  | Emotional | | |  | ADHD | | |  | Behavioral | | |
| --- | --- | --- | --- | --- | --- | --- | --- | --- | --- | --- | --- | --- |
|  | | |  | | |  | | |
|  |  | *OR* | 95 % CI | *p* |  | *OR* | 95 % CI | *p* |  | *OR* | 95 % CI | *p* |
| ADHD |  | 2.85 | [1.51, 5.39] | .001 |  |  |  |  |  |  |  |  |
| Behavioral |  | 4.46 | [2.41, 8.24] | .000 |  | 7.60 | [3.93, 14.71] | .000 |  |  |  |  |
| RAD |  | 3.05 | [1.62, 5.74] | .001 |  | 1.89 | [0.95, 3.77] | .070 |  | 6.50 | [3.39, 12.67] | .000 |
